# Supplementary material for: A strategy for extracting and analyzing large-scale quantitative epistatic interaction data
Source: PubMed Central journal article supplement (PMC1779568; doi:10.1186/gb-2006-7-7-r63), 2006-07-21
Supplement: gb-2006-7-7-r63-S3.pdf [file gb-2006-7-7-r63-S3.pdf]

## Additional File 3 - Image Capture Setup

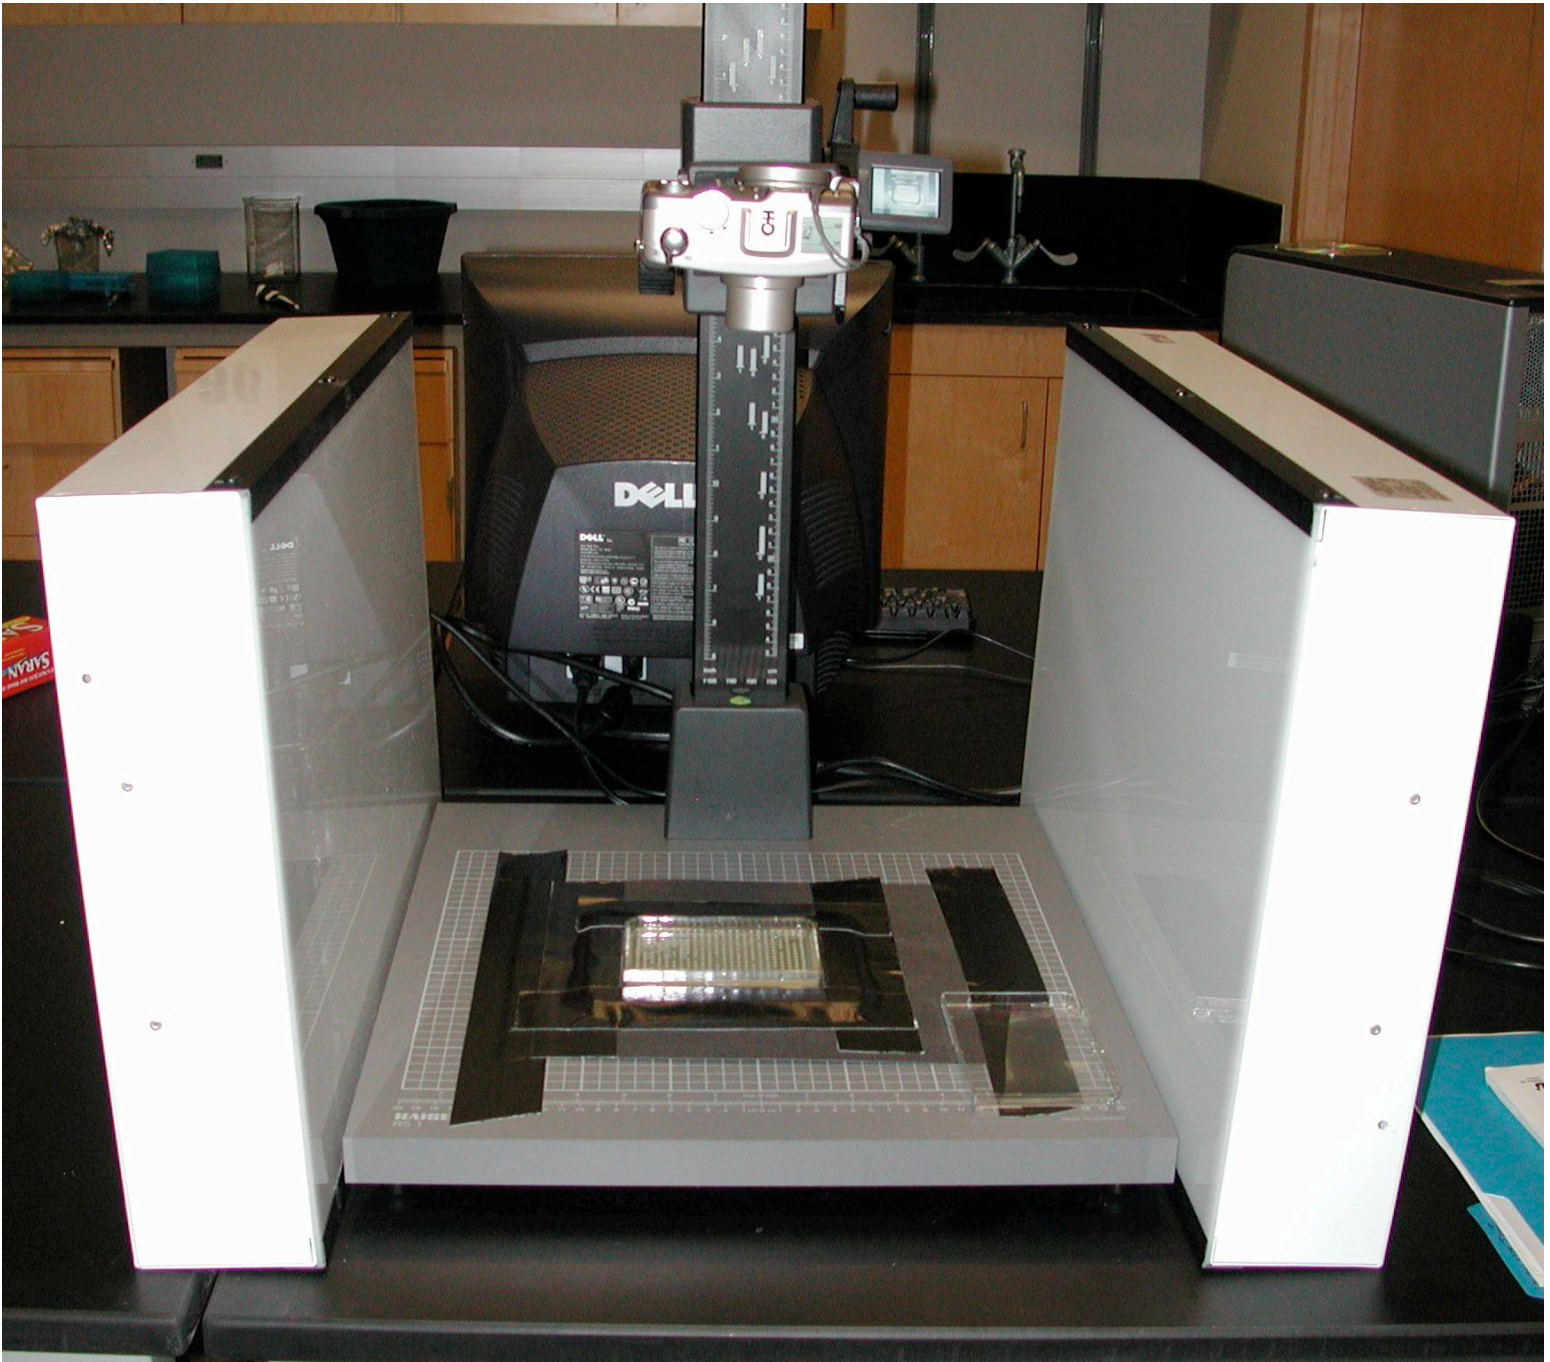

Shown are the digital camera, camera stand, and lighting sources assembled for image capturing.
